# Supplementary material for: Polycomb repressor complex 1 promotes gene silencing through H2AK119 mono-ubiquitination in acinar-to-ductal metaplasia and pancreatic cancer cells
Source: PubMed Central journal article supplement (PMC4905483; doi:10.18632/oncotarget.6717), 2015-12-22
Supplement: oncotarget-07-11424-s001.pdf [file oncotarget-07-11424-s001.pdf]

## Polycomb repressor complex 1 promotes gene silencing through H2AK119 mono-ubiquitination in acinar-to-ductal metaplasia and pancreatic cancer cells

### Supplementary Materials

**Supplementary Table S1: Primer sequences of genes**

| qRT-PCR Primer |                           |                           |
|----------------|---------------------------|---------------------------|
| Gene           | forward 5'-3'             | reverse 5'-3'             |
| <i>Amylase</i> | TCCACCTGTTTGAGTGGCGCTGGGT | TGGGTGGAGAGACCTGCACACCTGC |
| <i>Bmi1</i>    | GGCTCCAATGAAGACCGAGG      | ATCATTACCTCTTCCTTAGGCT    |
| <i>Hes1</i>    | AAAATTCCTCCTCCCCGGTG      | TTTGGTTTGTCCGGTGTGCG      |
| <i>Mist1</i>   | TCCCCAGTTGGAAGGGCCTCA     | TCCTGCATGGGTGTTCCGGCG     |
| <i>Ptfla</i>   | CTTGCAGGGCACTCTCTTTC      | CGATGTGAGCTGTCTCAGGA      |
| <i>Rbpj</i>    | GAGGGCGCGTCCCAAAACCC      | AAACTTCCCCGCCGATGGAGC     |
| <i>Rbpjl</i>   | GTATCGAAGTCAGTGGCGGT      | GCAGGCTCAGGTGAGTCAAA      |
| <i>Ring1b</i>  | GTTGATTCTCGAGTCTCGCTC     | TGAGACATTTCCGGCTCCTGC     |
| <i>Gata6</i>   | GAAGCGCGTGCCTTCATC        | GTAGTGGTTGTGGTGTGACAGTTG  |
| <i>Ppib</i>    | GGAGCGCAATATGAAGGTGC      | CTTATCGTTGGCCACGGAGG      |
| ChIP Primer    |                           |                           |
| Promoter       | forward 5'-3'             | reverse 5'-3'             |
| <i>Bmi1 P1</i> | CGGTGACTGTACGTTAGCCT      | TCAGCTCATCCCACAGCAAA      |
| <i>Bmi1 P2</i> | TGTGGTGGCAGTTCAAGCTA      | CTCCCTAGTGTACTTAGGACCA    |
| <i>Bmi1 P3</i> | GCCCTTTGGTGGGAACCTTGA     | TGAAACCACAGGCTCTTTCCT     |
| <i>Ptfla</i>   | GGACCAGATCCGACCCTACT      | CCGCTCCTACGTTCTTTGGT      |
| <i>Rbpj</i>    | CCCAACCTCGGCACTCAATG      | ATGCCACTGATTCCCTACTGG     |
| <i>Rbpjl</i>   | GTCGACACCGAATGAACCA       | GATTCGGGCTTCATCCCTCC      |
| <i>Gata6</i>   | GCGAGGTAGGAATACACAAGG     | GTAGTGGTTGTGGTGTGACAGTTG  |
